# Supplementary material for: Sequence Variations in the Flagellar Antigen Genes fliC H25 and fliC H28 of Escherichia coli and Their Use in Identification and Characterization of Enterohemorrhagic E. coli (EHEC) O145:H25 and O145:H28
Source: PubMed Central journal article supplement (PMC4441469; doi:10.1371/journal.pone.0126749), 2015-05-22
Supplement: pone.0126749.s001.pdf [file pone.0126749.s001.pdf]

Alignment Name: Translation of H28 and H46 strains.aaa\_bsm1

Length: 585

Translation of O145 CB12513  
Translation of O145 RM12581  
Translation of O28 CB9651  
Translation of O152 SE11  
Translation of O132 N87  
Translation of O26:H46 5306-56

|   |   |   |   |   |   |   |   |   |   |   |   |   |   |   |   |   |   |   |   |   |   |   |   |   |   |   |   |   |   |   |   |   |   |   |   |   |   |   |   |   |   |   |   |   |   |
|---|---|---|---|---|---|---|---|---|---|---|---|---|---|---|---|---|---|---|---|---|---|---|---|---|---|---|---|---|---|---|---|---|---|---|---|---|---|---|---|---|---|---|---|---|---|
| M | A | Q | V | I | N | T | N | S | L | S | L | I | T | Q | N | N | I | N | K | N | Q | S | A | L | S | S | S | I | E | R | L | S | S | G | L | R | I | N | S | A | K | D | D | A | A |
| M | A | Q | V | I | N | T | N | S | L | S | L | I | T | Q | N | N | I | N | K | N | Q | S | A | L | S | S | S | I | E | R | L | S | S | G | L | R | I | N | S | A | K | D | D | A | A |
| M | A | Q | V | I | N | T | N | S | L | S | L | I | T | Q | N | N | I | N | K | N | Q | S | A | L | S | S | S | I | E | R | L | S | S | G | L | R | I | N | S | A | K | D | D | A | A |
| M | A | Q | V | I | N | T | N | S | L | S | L | I | T | Q | N | N | I | N | K | N | Q | S | A | L | S | S | S | I | E | R | L | S | S | G | L | R | I | N | S | A | K | D | D | A | A |
| M | A | Q | V | I | N | T | N | S | L | S | L | I | T | Q | N | N | I | N | K | N | Q | S | A | L | S | S | S | I | E | R | L | S | S | G | L | R | I | N | S | A | K | D | D | A | A |

Translation of O145 CB12513  
Translation of O145 RM12581  
Translation of O28 CB9651  
Translation of O152 SE11  
Translation of O132 N87  
Translation of O26:H46 5306-56

|   |   |   |   |   |   |   |   |   |   |   |   |   |   |   |   |   |   |   |   |   |   |   |   |   |   |   |   |   |   |   |   |   |   |   |   |   |   |   |   |   |   |   |   |   |   |
|---|---|---|---|---|---|---|---|---|---|---|---|---|---|---|---|---|---|---|---|---|---|---|---|---|---|---|---|---|---|---|---|---|---|---|---|---|---|---|---|---|---|---|---|---|---|
| G | Q | A | I | A | N | R | F | T | S | N | I | K | G | L | T | Q | A | A | R | N | A | N | D | G | I | S | V | A | Q | T | T | E | G | A | L | S | E | I | N | N | N | L | Q | R | I |
| G | Q | A | I | A | N | R | F | T | S | N | I | K | G | L | T | Q | A | A | R | N | A | N | D | G | I | S | V | A | Q | T | T | E | G | A | L | S | E | I | N | N | N | L | Q | R | I |
| G | Q | A | I | A | N | R | F | T | S | N | I | K | G | L | T | Q | A | A | R | N | A | N | D | G | I | S | V | A | Q | T | T | E | G | A | L | S | E | I | N | N | N | L | Q | R | I |
| G | Q | A | I | A | N | R | F | T | S | N | I | K | G | L | T | Q | A | A | R | N | A | N | D | G | I | S | V | A | Q | T | T | E | G | A | L | S | E | I | N | N | N | L | Q | R | I |
| G | Q | A | I | A | N | R | F | T | S | N | I | K | G | L | T | Q | A | A | R | N | A | N | D | G | I | S | V | A | Q | T | T | E | G | A | L | S | E | I | N | N | N | L | Q | R | V |

Translation of O145 CB12513  
Translation of O145 RM12581  
Translation of O28 CB9651  
Translation of O152 SE11  
Translation of O132 N87  
Translation of O26:H46 5306-56

|   |   |   |   |   |   |   |   |   |   |   |   |   |   |   |   |   |   |   |   |   |   |   |   |   |   |   |   |   |   |   |   |   |   |   |   |   |   |   |   |   |   |   |   |   |   |
|---|---|---|---|---|---|---|---|---|---|---|---|---|---|---|---|---|---|---|---|---|---|---|---|---|---|---|---|---|---|---|---|---|---|---|---|---|---|---|---|---|---|---|---|---|---|
| R | E | L | T | V | Q | A | S | T | G | T | N | S | D | S | D | L | D | S | I | Q | D | E | I | K | S | R | L | D | E | I | D | R | V | S | G | Q | T | Q | F | N | G | V | N | V | L |
| R | E | L | T | V | Q | A | S | T | G | T | N | S | D | S | D | L | D | S | I | Q | D | E | I | K | S | R | L | D | E | I | D | R | V | S | G | Q | T | Q | F | N | G | V | N | V | L |
| R | E | L | T | V | Q | A | S | T | G | T | N | S | D | S | D | L | D | S | I | Q | D | E | I | K | S | R | L | D | E | I | D | R | V | S | G | Q | T | Q | F | N | G | V | N | V | L |
| R | E | L | T | V | Q | A | S | T | G | T | N | S | D | S | D | L | D | S | I | Q | D | E | I | K | S | R | L | D | E | I | D | R | V | S | G | Q | T | Q | F | N | G | V | N | V | L |
| R | E | L | T | V | Q | A | S | T | G | T | N | S | D | S | D | L | D | S | I | Q | D | E | I | K | S | R | L | D | E | I | D | R | V | S | G | Q | T | Q | F | N | G | V | N | V | L |

Alignment Name: Translation of H28 and H46 strains.aaa\_bsm1

Length: 585

Translation of O145 CB12513  
Translation of O145 RM12581  
Translation of O28 CB9651  
Translation of O152 SE11  
Translation of O132 N87  
Translation of O26:H46 5306-56

|   |     |   |     |   |     |   |     |   |     |   |   |   |   |   |   |   |   |   |   |   |   |   |   |   |   |   |   |   |   |   |   |   |   |   |   |   |   |   |   |   |   |   |   |   |   |
|---|-----|---|-----|---|-----|---|-----|---|-----|---|---|---|---|---|---|---|---|---|---|---|---|---|---|---|---|---|---|---|---|---|---|---|---|---|---|---|---|---|---|---|---|---|---|---|---|
|   | 140 |   | 150 |   | 160 |   | 170 |   | 180 |   |   |   |   |   |   |   |   |   |   |   |   |   |   |   |   |   |   |   |   |   |   |   |   |   |   |   |   |   |   |   |   |   |   |   |   |
| A | K   | D | G   | S | M   | K | I   | Q | V   | G | A | N | D | G | Q | T | I | T | I | D | L | K | K | I | D | S | D | T | L | G | L | S | G | F | N | V | N | G | G | G | A | V | A | N | T |
| A | K   | D | G   | S | M   | K | I   | Q | V   | G | A | N | D | G | Q | T | I | T | I | D | L | K | K | I | D | S | D | T | L | G | L | S | G | F | N | V | N | G | G | G | A | V | A | N | T |
| A | K   | D | G   | S | M   | K | I   | Q | V   | G | A | N | D | G | Q | T | I | T | I | D | L | K | K | I | D | S | D | T | L | G | L | S | G | F | N | V | N | G | G | G | A | V | A | N | T |
| A | K   | D | G   | S | M   | K | I   | Q | V   | G | A | N | D | G | Q | T | I | T | I | D | L | K | K | I | D | S | D | T | L | G | L | S | G | F | N | V | N | G | S | G | A | V | A | N | T |
| A | K   | D | G   | S | M   | K | I   | Q | V   | G | A | N | D | G | Q | T | I | T | I | D | L | K | K | I | D | S | S | T | L | K | L | T | G | F | N | V | N | G | S | G | S | V | A | N | T |
| A | K   | D | G   | S | M   | K | I   | Q | V   | G | A | N | D | G | Q | T | I | T | I | D | L | K | K | I | D | S | d | T | L | g | L | s | G | F | N | V | N | G | g | G | a | V | A | N | T |

Translation of O145 CB12513  
Translation of O145 RM12581  
Translation of O28 CB9651  
Translation of O152 SE11  
Translation of O132 N87  
Translation of O26:H46 5306-56

|   |     |   |     |   |     |   |     |   |     |   |   |   |   |   |   |   |   |   |   |   |   |   |   |   |   |   |   |   |   |   |   |   |   |   |   |   |   |   |   |   |   |   |   |   |   |
|---|-----|---|-----|---|-----|---|-----|---|-----|---|---|---|---|---|---|---|---|---|---|---|---|---|---|---|---|---|---|---|---|---|---|---|---|---|---|---|---|---|---|---|---|---|---|---|---|
|   | 190 |   | 200 |   | 210 |   | 220 |   | 230 |   |   |   |   |   |   |   |   |   |   |   |   |   |   |   |   |   |   |   |   |   |   |   |   |   |   |   |   |   |   |   |   |   |   |   |   |
| A | A   | T | K   | D | E   | L | A   | A | A   | A | A | A | A | A | G | T | T | P | A | V | G | T | D | G | V | T | K | Y | T | V | D | A | G | L | N | K | A | T | A | A | N | V | F | A | N |
| A | A   | T | K   | D | E   | L | A   | A | A   | A | A | A | A | A | G | T | T | P | A | V | G | T | D | G | V | T | K | Y | T | V | D | A | G | L | N | K | A | T | A | A | N | V | F | A | N |
| A | A   | T | K   | D | E   | L | A   | A | A   | A | A | A | A | A | G | T | T | P | A | V | G | T | D | G | V | T | K | Y | T | V | D | A | G | L | N | K | A | T | A | A | N | V | F | A | N |
| A | A   | T | K   | S | D   | L | A   | A | A   | Q | L | L | A | P | G | T | A | D | A | N | - | - | - | G | T | V | T | Y | T | V | S | A | G | L | K | T | S | T | A | A | D | V | I | A | S |
| A | A   | T | K   | S | D   | L | A   | A | A   | Q | L | L | A | P | G | T | A | D | A | N | - | - | - | G | T | V | T | Y | T | V | S | A | G | L | K | T | S | T | A | A | D | V | I | A | S |
| A | A   | T | K   | D | E   | L | A   | A | A   | A | A | - | A | A | G | T | T | P | A | V | G | T | D | G | V | T | K | Y | T | V | D | A | G | L | N | K | A | T | A | A | N | V | F | A | N |
| A | A   | T | K   | d | e   | L | A   | A | A   | a | a | a | A | a | G | T | t | p | A | v | G | T | D | G | v | t | k | Y | T | V | d | A | G | L | n | k | a | T | A | A | n | V | f | A | n |

Translation of O145 CB12513  
Translation of O145 RM12581  
Translation of O28 CB9651  
Translation of O152 SE11  
Translation of O132 N87  
Translation of O26:H46 5306-56

|   |     |   |     |   |     |   |     |   |   |   |   |   |   |   |   |   |   |   |   |   |   |   |   |   |   |   |   |   |   |   |   |   |   |   |   |   |   |   |   |   |   |   |   |   |   |
|---|-----|---|-----|---|-----|---|-----|---|---|---|---|---|---|---|---|---|---|---|---|---|---|---|---|---|---|---|---|---|---|---|---|---|---|---|---|---|---|---|---|---|---|---|---|---|---|
|   | 240 |   | 250 |   | 260 |   | 270 |   |   |   |   |   |   |   |   |   |   |   |   |   |   |   |   |   |   |   |   |   |   |   |   |   |   |   |   |   |   |   |   |   |   |   |   |   |   |
| L | A   | D | G   | A | V   | V | N   | A | S | I | S | N | G | F | G | - | A | A | A | T | D | Y | T | Y | N | K | A | T | N | D | F | T | F | N | A | S | I | A | A | A | A | - | V | G | D |
| L | A   | D | G   | A | V   | V | N   | A | S | I | S | N | G | F | G | - | A | A | A | T | D | Y | T | Y | N | K | A | T | N | D | F | T | F | N | A | S | I | A | A | A | A | - | V | G | D |
| L | A   | D | G   | A | V   | V | N   | A | S | I | S | N | G | F | G | - | A | A | A | T | D | Y | T | Y | N | K | A | T | N | D | F | T | F | N | A | S | I | A | A | A | A | - | V | G | D |
| L | A   | N | N   | A | K   | V | N   | A | T | I | A | N | G | F | G | S | P | T | A | T | D | Y | T | Y | N | S | A | T | G | D | F | T | Y | S | A | T | I | A | A | G | T | N | S | G | D |
| L | A   | N | N   | A | K   | V | N   | A | T | I | A | N | G | F | G | S | P | T | A | T | D | Y | T | Y | N | S | A | T | G | D | F | T | Y | S | A | T | I | A | A | G | T | N | S | G | D |
| L | A   | D | G   | A | V   | V | D   | A | S | I | S | N | G | F | G | A | A | A | A | T | D | Y | T | Y | N | K | A | T | N | D | F | T | F | N | A | S | I | A | A | X | a | n | X | G | D |
| L | A   | d | g   | A | v   | V | n   | A | s | I | s | N | G | F | G | s | a | A | A | T | D | Y | T | Y | N | k | A | T | n | D | F | T | f | n | A | s | I | A | A | X | a | n | X | G | D |

Alignment Name: Translation of H28 and H46 strains.aaa\_bsm1

Length: 585

Translation of O145 CB12513  
 Translation of O145 RM12581  
 Translation of O28 CB9651  
 Translation of O152 SE11  
 Translation of O132 N87  
 Translation of O26:H46 5306-56

|   |     |   |     |   |     |   |     |   |     |   |   |   |   |   |   |   |   |   |   |   |   |   |   |   |   |   |   |   |   |   |   |   |   |   |   |   |   |   |   |   |   |   |   |   |   |
|---|-----|---|-----|---|-----|---|-----|---|-----|---|---|---|---|---|---|---|---|---|---|---|---|---|---|---|---|---|---|---|---|---|---|---|---|---|---|---|---|---|---|---|---|---|---|---|---|
|   | 280 |   | 290 |   | 300 |   | 310 |   | 320 |   |   |   |   |   |   |   |   |   |   |   |   |   |   |   |   |   |   |   |   |   |   |   |   |   |   |   |   |   |   |   |   |   |   |   |   |
| S | N   | S | A   | A | L   | Q | S   | F | L   | T | P | K | A | G | D | T | A | N | L | S | V | K | I | G | T | T | S | V | D | V | V | L | A | S | D | G | K | I | T | A | K | D | G | S | E |
| S | N   | S | A   | A | L   | Q | S   | F | L   | T | P | K | A | G | D | T | A | N | L | S | V | K | I | G | T | T | S | V | D | V | V | L | A | S | D | G | K | I | T | A | K | D | G | S | E |
| S | N   | S | A   | A | L   | Q | S   | F | L   | T | P | K | A | G | D | T | A | N | L | S | V | K | I | G | T | T | S | V | D | V | V | L | A | S | D | G | K | I | T | A | K | D | G | S | E |
| S | N   | S | A   | Q | L   | Q | S   | F | L   | T | P | K | A | G | D | T | A | N | L | N | V | K | I | G | S | T | S | I | D | V | V | L | A | S | D | G | K | I | T | A | K | D | G | S | E |
| S | N   | S | A   | Q | L   | Q | S   | F | L   | T | P | K | A | G | D | T | A | N | L | N | V | K | I | G | S | T | S | I | D | V | V | L | A | S | D | G | K | I | T | A | K | D | G | S | E |
| S | N   | S | A   | A | L   | Q | S   | F | L   | T | P | K | A | G | D | T | A | N | L | S | V | K | I | G | T | T | S | V | N | V | V | L | A | S | D | G | K | I | T | A | K | D | G | S | A |
| S | N   | S | A   | a | L   | Q | S   | F | L   | T | P | K | A | G | D | T | A | N | L | s | V | K | I | G | t | T | S | v | d | V | V | L | A | S | D | G | K | I | T | A | K | D | G | S | e |

Translation of O145 CB12513  
 Translation of O145 RM12581  
 Translation of O28 CB9651  
 Translation of O152 SE11  
 Translation of O132 N87  
 Translation of O26:H46 5306-56

|   |     |   |     |   |     |   |     |   |   |   |   |   |   |   |   |   |   |   |   |   |   |   |   |   |   |   |   |   |   |   |   |   |   |   |   |   |   |   |   |   |   |   |   |   |   |
|---|-----|---|-----|---|-----|---|-----|---|---|---|---|---|---|---|---|---|---|---|---|---|---|---|---|---|---|---|---|---|---|---|---|---|---|---|---|---|---|---|---|---|---|---|---|---|---|
|   | 330 |   | 340 |   | 350 |   | 360 |   |   |   |   |   |   |   |   |   |   |   |   |   |   |   |   |   |   |   |   |   |   |   |   |   |   |   |   |   |   |   |   |   |   |   |   |   |   |
| L | F   | I | D   | V | D   | G | N   | L | T | Q | N | N | A | G | T | V | K | A | A | T | L | D | A | L | T | K | N | W | H | T | T | G | T | P | D | A | V | S | T | V | I | T | T | E | D |
| L | F   | I | D   | V | D   | G | N   | L | T | Q | N | N | A | G | T | V | K | A | A | T | L | D | A | L | T | K | N | W | H | T | T | G | T | P | D | A | V | S | T | V | I | T | T | E | D |
| L | F   | I | D   | V | D   | G | N   | L | T | Q | N | N | A | G | T | V | K | A | A | T | L | D | A | L | T | K | N | W | H | T | T | G | T | P | D | A | V | S | T | V | I | T | T | E | D |
| L | F   | I | D   | V | D   | G | N   | L | T | Q | N | N | A | G | T | V | K | A | A | T | L | D | A | L | T | K | N | W | H | T | T | G | T | P | S | A | V | S | T | V | I | T | T | E | D |
| L | Y   | I | D   | S | T   | G | N   | L | T | Q | N | S | A | G | T | V | T | A | A | T | L | D | G | L | T | K | N | H | D | A | T | G | - | - | - | A | V | G | V | D | I | T | T | A | D |
| L | f   | I | D   | v | d   | G | N   | L | T | Q | N | n | A | G | T | V | k | A | A | T | L | D | a | L | T | K | N | w | h | t | T | G | T | P | d | A | V | s | t | v | I | T | T | e | D |

Translation of O145 CB12513  
 Translation of O145 RM12581  
 Translation of O28 CB9651  
 Translation of O152 SE11  
 Translation of O132 N87  
 Translation of O26:H46 5306-56

|   |     |   |     |   |     |   |     |   |     |   |   |   |   |   |   |   |   |   |   |   |   |   |   |   |   |   |   |   |   |   |   |   |   |   |   |   |   |   |   |   |   |   |   |   |   |
|---|-----|---|-----|---|-----|---|-----|---|-----|---|---|---|---|---|---|---|---|---|---|---|---|---|---|---|---|---|---|---|---|---|---|---|---|---|---|---|---|---|---|---|---|---|---|---|---|
|   | 370 |   | 380 |   | 390 |   | 400 |   | 410 |   |   |   |   |   |   |   |   |   |   |   |   |   |   |   |   |   |   |   |   |   |   |   |   |   |   |   |   |   |   |   |   |   |   |   |   |
| E | T   | T | F   | T | L   | A | G   | G | T   | D | A | T | T | - | - | - | S | G | T | I | T | V | A | N | A | R | M | S | A | E | S | L | Q | S | A | T | K | S | T | G | F | T | V | D | V |
| E | T   | T | F   | T | L   | A | G   | G | T   | D | A | T | T | - | - | - | S | G | T | I | T | V | A | N | A | R | M | S | A | E | S | L | Q | S | A | T | K | S | T | G | F | T | V | D | V |
| E | T   | T | F   | T | L   | A | G   | G | T   | D | A | T | T | - | - | - | S | G | T | I | T | V | A | N | A | R | M | S | A | E | S | L | Q | S | A | T | K | S | T | G | F | T | V | D | V |
| E | T   | T | F   | T | L   | A | G   | G | T   | D | A | T | T | - | - | - | S | G | A | I | T | V | A | N | A | R | M | S | A | E | S | L | Q | S | A | T | K | S | T | G | F | T | V | D | V |
| E | T   | T | F   | T | L   | A | G   | G | T   | D | A | T | T | - | - | - | S | G | A | I | T | V | A | N | A | R | M | S | A | E | S | L | Q | S | A | T | K | S | T | G | F | T | V | D | V |
| G | A   | T | I   | S | L   | A | G   | S | A   | N | A | A | T | G | T | Q | S | G | A | I | T | L | K | N | V | R | I | S | A | D | A | L | Q | S | A | A | K | G | T | V | I | N | V | D | N |
| e | t   | T | f   | t | L   | A | G   | g | t   | d | A | t | T | G | T | Q | S | G | X | I | T | v | a | N | a | R | m | S | A | e | s | L | Q | S | A | t | K | s | T | g | f | t | V | D | v |
